# Supplementary material
Source: PubMed Central journal article supplement (PMC7423703)
Supplement: NIHMS1568828-supplement-1.pdf [file NIHMS1568828-supplement-1.pdf]

**Supplementary Figure 1.** The distribution of interval (in years) between randomization and polyp diagnosis in the vitamin D and placebo groups

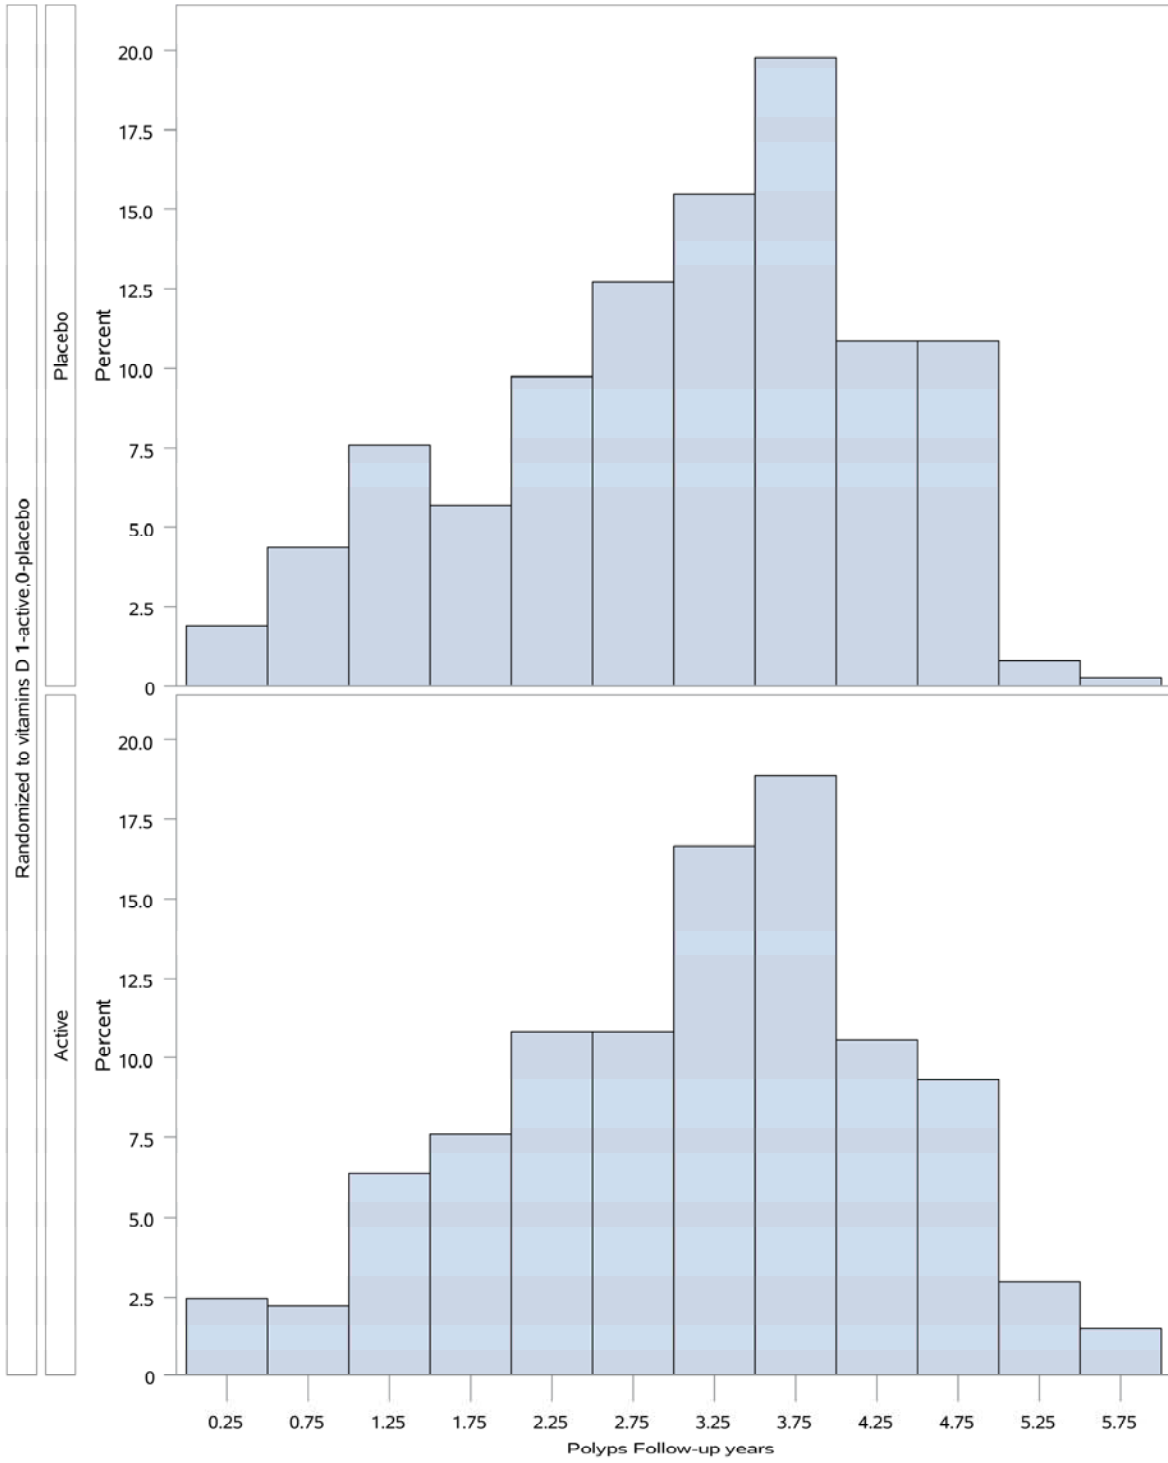

**Supplementary Table 1. Association of vitamin D supplementation with risk of advanced and nonadvanced conventional adenomas according to serum 25(OH)D level at randomization<sup>a</sup>**

|                                       | Advanced conventional adenomas |                  | Nonadvanced conventional adenomas |                  |
|---------------------------------------|--------------------------------|------------------|-----------------------------------|------------------|
|                                       | Placebo group                  | Vitamin D group  | Placebo group                     | Vitamin D group  |
| Serum 25(OH)D <30 ng/mL               |                                |                  |                                   |                  |
| No. of cases                          | 22                             | 13               | 66                                | 58               |
| OR (95% CI) <sup>a</sup>              | 1 (ref)                        | 0.60 (0.30-1.20) | 1 (ref)                           | 0.89 (0.63-1.27) |
| Serum 25(OH)D ≥30 ng/mL               |                                |                  |                                   |                  |
| No. of cases                          | 21                             | 32               | 88                                | 100              |
| OR (95% CI) <sup>a</sup>              | 1 (ref)                        | 1.50 (0.87-2.61) | 1 (ref)                           | 1.12 (0.84-1.50) |
| <i>P</i> for interaction <sup>b</sup> |                                | 0.04             |                                   | 0.32             |

Abbreviations: CI, confidence interval; OR, odds ratio.

<sup>a</sup>Logistic regression was adjusted for age, sex, fish oil treatment assignment, and use of colonoscopy or sigmoidoscopy in the past 10 years prior to randomization.

<sup>b</sup>*P* for interaction was calculated by Wald test for the product term between vitamin D randomization assignment and baseline serum 25(OH)D level (binary).

**Supplementary Table 2. Association of vitamin D supplementation with risk of conventional adenomas and serrated polyps according to histopathological features**

|                                         | Conventional adenomas         |                                 |                          | Serrated polyps               |                                 |                          |
|-----------------------------------------|-------------------------------|---------------------------------|--------------------------|-------------------------------|---------------------------------|--------------------------|
|                                         | No. of cases in placebo group | No. of cases in vitamin D group | OR (95% CI) <sup>a</sup> | No. of cases in placebo group | No. of cases in vitamin D group | OR (95% CI) <sup>a</sup> |
| <b>Size</b>                             |                               |                                 |                          |                               |                                 |                          |
| <10mm                                   | 215                           | 225                             | 1.05 (0.87-1.27)         | 116                           | 130                             | 1.12 (0.87-1.44)         |
| ≥10mm                                   | 52                            | 62                              | 1.20 (0.83-1.74)         | 29                            | 34                              | 1.18 (0.72-1.93)         |
| <i>P</i> for heterogeneity <sup>c</sup> |                               |                                 | 0.67                     |                               |                                 | 0.96                     |
| <b>Location</b>                         |                               |                                 |                          |                               |                                 |                          |
| Proximal colon                          | 149                           | 150                             | 1.01 (0.80-1.27)         | 53                            | 69                              | 1.30 (0.91-1.87)         |
| Distal colon                            | 54                            | 72                              | 1.34 (0.94-1.91)         | 42                            | 38                              | 0.91 (0.58-1.41)         |
| Rectum                                  | 18                            | 14                              | 0.78 (0.39-1.57)         | 40                            | 28                              | 0.70 (0.43-1.14)         |
| Multiple location                       | 66                            | 72                              | 1.10 (0.78-1.53)         | 34                            | 37                              | 1.09 (0.68-1.74)         |
| <i>P</i> for heterogeneity <sup>c</sup> |                               |                                 | 0.53                     |                               |                                 | 0.27                     |
| <b>Multiplicity</b>                     |                               |                                 |                          |                               |                                 |                          |
| Single                                  | 152                           | 154                             | 1.02 (0.81-1.27)         | 89                            | 90                              | 1.01 (0.75-1.36)         |
| Multiple                                | 127                           | 149                             | 1.18 (0.93-1.50)         | 70                            | 76                              | 1.09 (0.79-1.51)         |
| <i>P</i> for heterogeneity <sup>c</sup> |                               |                                 | 0.48                     |                               |                                 | 0.81                     |
| <b>Histology</b>                        |                               |                                 |                          |                               |                                 |                          |
| Tubular adenoma                         | 242                           | 262                             | 1.09 (0.91-1.30)         | -                             | -                               | -                        |
| Tubulovillous adenoma                   | 18                            | 25                              | 1.39 (0.76-2.56)         | -                             | -                               | -                        |
| Villous or high-grade dysplasia         | 9                             | 9                               | 1.00 (0.40-2.53)         | -                             | -                               | -                        |
| <i>P</i> for heterogeneity <sup>c</sup> |                               |                                 | 0.77                     | -                             | -                               | -                        |
| <b>Risk stratification</b>              |                               |                                 |                          |                               |                                 |                          |
| Advanced <sup>b</sup>                   | 64                            | 77                              | 1.21 (0.87-1.69)         | -                             | -                               | -                        |
| Non-advanced <sup>b</sup>               | 223                           | 231                             | 1.04 (0.86-1.25)         | -                             | -                               | -                        |
| <i>P</i> for heterogeneity <sup>c</sup> |                               |                                 | 0.50                     | -                             | -                               | -                        |

Abbreviations: CI, confidence interval; OR, odds ratio.

<sup>a</sup>Logistic regression was adjusted for age, sex, fish oil treatment assignment, and use of colonoscopy or sigmoidoscopy in the past 10 years prior to randomization.

<sup>b</sup>Advanced conventional adenomas were defined as those having at least 1 conventional adenoma of 10 mm or greater in diameter or with advanced histology (tubulovillous/villous histologic features or high-grade or severe dysplasia).

<sup>c</sup>*P* for heterogeneity was calculated by case-only analysis.

**Supplementary Table 3. Stratified association of vitamin D supplementation with risk of conventional adenomas and serrated polyps<sup>a</sup>**

|                                       | Conventional adenomas         |                                 |                  | Serrated polyps               |                                 |                  |
|---------------------------------------|-------------------------------|---------------------------------|------------------|-------------------------------|---------------------------------|------------------|
|                                       | No. of cases in placebo group | No. of cases in vitamin D group | OR (95% CI)      | No. of cases in placebo group | No. of cases in vitamin D group | OR (95% CI)      |
| Age, year                             |                               |                                 |                  |                               |                                 |                  |
| <60                                   | 35                            | 44                              | 1.28 (0.82-2.01) | 24                            | 27                              | 1.13 (0.65-1.97) |
| 60-69                                 | 185                           | 194                             | 1.05 (0.86-1.29) | 111                           | 112                             | 1.01 (0.78-1.32) |
| ≥70                                   | 67                            | 70                              | 1.05 (0.75-1.48) | 34                            | 33                              | 0.98 (0.61-1.59) |
| <i>P</i> for interaction <sup>b</sup> |                               |                                 | 0.75             |                               |                                 | 0.92             |
| Sex                                   |                               |                                 |                  |                               |                                 |                  |
| Women                                 | 126                           | 125                             | 0.99 (0.77-1.27) | 77                            | 72                              | 0.93 (0.68-1.29) |
| Men                                   | 161                           | 183                             | 1.15 (0.93-1.42) | 92                            | 100                             | 1.09 (0.82-1.45) |
| <i>P</i> for interaction <sup>b</sup> |                               |                                 | 0.38             |                               |                                 | 0.48             |
| Race/ethnicity                        |                               |                                 |                  |                               |                                 |                  |
| Non-Hispanic white                    | 229                           | 247                             | 1.08 (0.90-1.30) | 136                           | 140                             | 1.03 (0.81-1.31) |
| African American                      | 28                            | 31                              | 1.11 (0.66-1.85) | 17                            | 15                              | 0.88 (0.44-1.77) |
| Others                                | 23                            | 26                              | 1.12 (0.63-1.97) | 12                            | 15                              | 1.21 (0.56-2.61) |
| <i>P</i> for interaction <sup>b</sup> |                               |                                 | 0.99             |                               |                                 | 0.82             |
| Family history of colorectal cancer   |                               |                                 |                  |                               |                                 |                  |
| No                                    | 240                           | 239                             | 1.00 (0.83-1.20) | 142                           | 140                             | 0.99 (0.78-1.25) |
| Yes                                   | 33                            | 48                              | 1.44 (0.92-2.25) | 22                            | 27                              | 1.20 (0.68-2.12) |
| <i>P</i> for interaction <sup>b</sup> |                               |                                 | 0.14             |                               |                                 | 0.54             |
| Body mass index, kg/m <sup>2</sup>    |                               |                                 |                  |                               |                                 |                  |
| <25                                   | 84                            | 92                              | 1.12 (0.83-1.51) | 49                            | 48                              | 1.00 (0.67-1.49) |
| 25-29.9                               | 121                           | 118                             | 0.98 (0.76-1.27) | 68                            | 67                              | 0.99 (0.70-1.39) |
| ≥30                                   | 77                            | 89                              | 1.14 (0.84-1.55) | 51                            | 51                              | 0.98 (0.66-1.45) |
| <i>P</i> for interaction <sup>b</sup> |                               |                                 | 0.69             |                               |                                 | 0.99             |
| Physical activity, MET-hours/week     |                               |                                 |                  |                               |                                 |                  |
| <15                                   | 115                           | 146                             | 1.27 (0.99-1.63) | 59                            | 73                              | 1.24 (0.88-1.75) |
| ≥15                                   | 171                           | 159                             | 0.94 (0.75-1.17) | 106                           | 99                              | 0.94 (0.72-1.24) |
| <i>P</i> for interaction <sup>b</sup> |                               |                                 | 0.07             |                               |                                 | 0.23             |
| Smoking                               |                               |                                 |                  |                               |                                 |                  |
| Never                                 | 140                           | 166                             | 1.20 (0.96-1.51) | 72                            | 81                              | 1.14 (0.83-1.56) |
| Past                                  | 129                           | 117                             | 0.90 (0.70-1.16) | 80                            | 72                              | 0.90 (0.65-1.24) |
| Current                               | 16                            | 23                              | 1.42 (0.75-2.71) | 12                            | 18                              | 1.49 (0.71-3.12) |
| <i>P</i> for interaction <sup>b</sup> |                               |                                 | 0.17             |                               |                                 | 0.35             |
| Alcohol use                           |                               |                                 |                  |                               |                                 |                  |
| <1/week                               | 83                            | 93                              | 1.14 (0.84-1.53) | 51                            | 47                              | 0.93 (0.62-1.38) |
| ≥1/week                               | 202                           | 212                             | 1.05 (0.86-1.28) | 117                           | 125                             | 1.07 (0.83-1.38) |
| <i>P</i> for interaction <sup>b</sup> |                               |                                 | 0.67             |                               |                                 | 0.56             |
| Aspirin use                           |                               |                                 |                  |                               |                                 |                  |

|                                                           |     |     |                  |     |     |                  |
|-----------------------------------------------------------|-----|-----|------------------|-----|-----|------------------|
| No                                                        | 133 | 164 | 1.23 (0.98-1.55) | 79  | 101 | 1.28 (0.95-1.72) |
| Yes                                                       | 151 | 142 | 0.95 (0.75-1.20) | 84  | 69  | 0.83 (0.60-1.14) |
| <i>P</i> for interaction <sup>b</sup>                     |     |     | 0.12             |     |     | 0.05             |
| Use of vitamin D supplements at randomization             |     |     |                  |     |     |                  |
| No                                                        | 159 | 165 | 1.03 (0.83-1.29) | 89  | 90  | 1.01 (0.75-1.35) |
| Yes                                                       | 128 | 143 | 1.14 (0.89-1.45) | 80  | 82  | 1.05 (0.77-1.43) |
| <i>P</i> for interaction <sup>b</sup>                     |     |     | 0.56             |     |     | 0.86             |
| Randomization in the n-3 fatty acid portion of trial      |     |     |                  |     |     |                  |
| Placebo group                                             | 136 | 165 | 1.22 (0.97-1.54) | 82  | 85  | 1.04 (0.77-1.41) |
| Active-agent group                                        | 151 | 143 | 0.95 (0.75-1.19) | 87  | 87  | 1.00 (0.74-1.35) |
| <i>P</i> for interaction <sup>b</sup>                     |     |     | 0.13             |     |     | 0.86             |
| History of colonoscopy/sigmoidoscopy in the past 10 years |     |     |                  |     |     |                  |
| No                                                        | 58  | 78  | 1.36 (0.97-1.92) | 39  | 50  | 1.30 (0.85-1.98) |
| Yes                                                       | 229 | 230 | 1.00 (0.83-1.21) | 130 | 122 | 0.94 (0.73-1.20) |
| <i>P</i> for interaction <sup>b</sup>                     |     |     | 0.12             |     |     | 0.19             |
| History of polyps at randomization                        |     |     |                  |     |     |                  |
| No                                                        | 271 | 296 | 1.10 (0.93-1.30) | 164 | 166 | 1.01 (0.82-1.26) |
| Yes                                                       | 16  | 12  | 0.75 (0.35-1.58) | 5   | 6   | 1.21 (0.37-3.98) |
| <i>P</i> for interaction <sup>b</sup>                     |     |     | 0.33             |     |     | 0.79             |

Abbreviations: CI, confidence interval; DHA, docosahexaenoic acid; EPA, eicosapentaenoic acid; MET, metabolic equivalent; OR, odds ratio.

<sup>a</sup> All stratified variables were assessed at baseline enrollment. Logistic regression was used to calculate the odds ratio with adjustment for age, sex, fish oil treatment assignment, and use of colonoscopy or sigmoidoscopy in the past 10 years prior to randomization.

<sup>b</sup> *P* for interaction was calculated by Wald test for the product term between intervention assignment and the stratified variable.
